# Supplementary material for: BRCA1/2 Molecular Assay for Ovarian Cancer Patients: A Survey through Italian Departments of Oncology and Molecular and Genomic Diagnostic Laboratories
Source: MDPI journal article supplement (doi:10.3390/diagnostics9040146), 2019-10-09
Supplement: s1 [file s1]

## **SURVEY FOR ITALIAN ONCOLOGY CENTRES: BRCA AND MANAGEMENT OF THE PATIENT WITH OVARIAN CANCER**

1. Is there a genetic counseling clinic in your centre?
  - ☐ Yes
  - ☐ No
2. Is it formally recognized by the host institution and/or the Region?
  - ☐ Yes
  - ☐ No
3. Who is responsible for the management of the company?
  - ☐ Department of Medical Genetics
  - ☐ Department of Oncology
  - ☐ Other (*specify*)
4. Who is in the genetic counseling clinic?  
(*multiple answers possible*)
  - ☐ Geneticist Doctor
  - ☐ Geneticist Biologist
  - ☐ Oncologist
  - ☐ Surgeon
  - ☐ Nurse
  - ☐ Psychologist
  - ☐ Other (*specify*)
5. Are the evaluations on **BRCA GERMLINE tests** carried out after evaluation of the ovarian cancer patient in the genetic counseling clinic?
  - ☐ YES
  - ☐ NO
6. If the answer is NO: is the request made directly by the oncologist (doctor, gynaecologist) after an interview with the patient (*minicounseling*)?
  - ☐ YES
  - ☐ NO
7. Are the evaluations on **BRCA SOMATIC tests** carried out after the evaluation of the patient in the genetic counseling clinic?
  - ☐ YES
  - ☐ NO
8. If the answer is NO: is the request made directly by the oncologist (doctor, gynaecologist) after an interview with the patient (*minicounseling*)?
  - ☐ YES
  - ☐ NO

9. In your CENTRE, in the patient with ovarian cancer, it is carried out as FIRST evaluation:
  - Germline BRCA
  - Somatic BRCA
10. In case BRCA germline test firstly evaluated: if the patient with ovarian cancer is BRCA NOT mutated, do you then perform somatic BRCA?
  - YES
  - NO
11. If the first evaluation is the somatic BRCA test and the patient is found to be mutated, do you perform BRCA germlines for the detection of that mutation?
  - YES
  - NO
12. In the case of a patient with BRCA-germline mutated ovarian carcinoma, is the family initiated into a genetic counseling pathway?
  - NO
  - YES
13. If YES:
  - In the same institution
  - In other institution
