# Supplementary material for: BRCA1/2 Molecular Assay for Ovarian Cancer Patients: A Survey through Italian Departments of Oncology and Molecular and Genomic Diagnostic Laboratories
Source: MDPI journal article supplement (doi:10.3390/diagnostics9040146), 2019-10-09
Supplement: s1 [file s1]

## SURVEY FOR MOLECULAR BIOLOGY LABORATORIES

### Mutational status assessment of the *BRCA1* and *BRCA 2* germline and/or somatic genes

#### Germline BRCA

1. In which year did the activity begin?

*(integer)*

2. Which technologies are used for the complete BRCA test?

*(multiple answers possible)*

- |  |        |
|--|--------|
|  | NGS    |
|  | Sanger |
|  | MLPA   |
|  | Other  |

*(specify)*

3. If you use NGS, please specify which technologies:

- |  |                        |
|--|------------------------|
|  | Commercial kits CE-IVD |
|  | Commercial kits RUO    |
|  | Homemade pipeline      |

4. What is the **total number of tests carried out in 2016?**

*(integer)*

5. Specify:

*(integer)*

Total number of tests performed on breast cancer patients

Total number of tests performed for patients with ovarian cancer

Total number of tests performed for patients with other tumours

Total number of tests performed on healthy subjects

6. What is the total number of **complete tests** carried out in 2016?

*(integer)*

7. What is the total number of **genetic tests for the family variant ALREADY KNOWN** carried out in 2016?

*(integer)*

## Somatic BRCA

1. Is the BRCA test performed on tumor tissue?

☐ Yes  
☐ No.

2. If the answer is YES: it is performed on tumor tissue:

☐ Paraffin wax  
☐ Frozen

3. Is the tumor tissue reviewed by a PATOLOGIST before the BRCA test?

☐ Yes  
☐ No

4. In which year did the activity begin?

  
*(integer)*

5. Which NGS technologies are used for the complete BRCA test?

☐ Commercial kits CE-IVD  
☐ Commercial kits RUO  
☐ Homemade pipeline

6. What is the **total number of tests carried out in 2016**?

  
*(integer)*

7. Specify:

Total number of tests performed for patients with ovarian cancer

Total number of tests performed for patients with breast cancer

Total number of tests performed for patients with other tumours

  
  


## VUS

1. What criteria are used for the **classification of** variants (VUS)?

☐ IARC  
☐ ACMG/AMP  
☐ Other

*(specify)*

2. What criteria are used for the **interpretation of** variants (VUS)?

☐ ENIGMA  
☐ ACMG/AMP  
☐ Other

*(specify)*
